# Supplementary material
Source: Springer Nature journal article supplement (https://www.springermedizin.de/resource/supplementary/12950_2009_152_MOESM2_ESM.pdf/9558072)

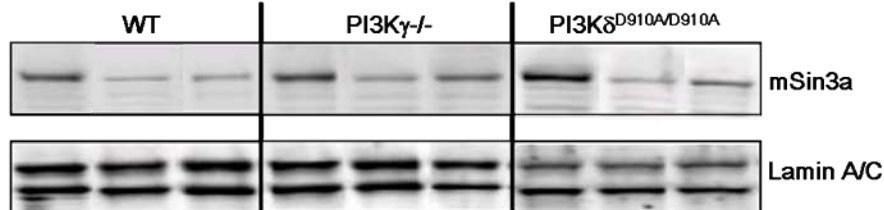

|            | WT |   |   | PI3K $\gamma^{-/-}$ |   |   | PI3K $\delta^{D910A/D910A}$ |   |   |
|------------|----|---|---|---------------------|---|---|-----------------------------|---|---|
| Smoke      | -  | + | + | -                   | + | + | -                           | + | + |
| Budesonide | -  | - | + | -                   | - | + | -                           | - | + |

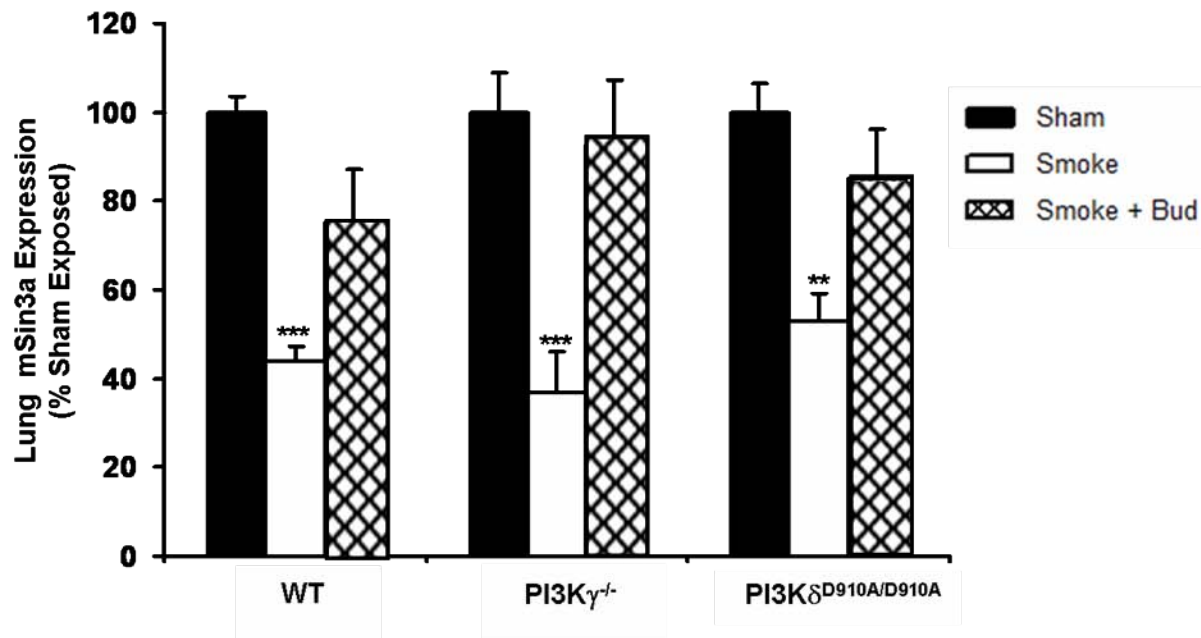

Supplement: MOESM2 [file 9558072]
